# Supplementary material for: Objective Evaluation of Active Interactions between the Operator and Display Screen Equipment Using an Innovative Acquisition System
Source: MDPI journal article supplement (doi:10.3390/bioengineering10060686), 2023-06-04

## Supplementary Materials

Text used in the READ and COPY tasks

|                                                                                                                                                                                                                                                                                                                                                                                                                                                                                                                                                                                                                                                                                                                                                                                                                                                                                                                                                                                                                                                                                                                                                                                                                                                                                                                                                                                                                                                                                                                                                                                                                                                                                                                                                                                                                                                                                                                                                                                                                                                                                                                                                                                                                                                                                                                                                                                                                                                                                                                                                                                                                                                                                               |
|-----------------------------------------------------------------------------------------------------------------------------------------------------------------------------------------------------------------------------------------------------------------------------------------------------------------------------------------------------------------------------------------------------------------------------------------------------------------------------------------------------------------------------------------------------------------------------------------------------------------------------------------------------------------------------------------------------------------------------------------------------------------------------------------------------------------------------------------------------------------------------------------------------------------------------------------------------------------------------------------------------------------------------------------------------------------------------------------------------------------------------------------------------------------------------------------------------------------------------------------------------------------------------------------------------------------------------------------------------------------------------------------------------------------------------------------------------------------------------------------------------------------------------------------------------------------------------------------------------------------------------------------------------------------------------------------------------------------------------------------------------------------------------------------------------------------------------------------------------------------------------------------------------------------------------------------------------------------------------------------------------------------------------------------------------------------------------------------------------------------------------------------------------------------------------------------------------------------------------------------------------------------------------------------------------------------------------------------------------------------------------------------------------------------------------------------------------------------------------------------------------------------------------------------------------------------------------------------------------------------------------------------------------------------------------------------------|
| <b>a) Il bar sotto il mare</b>                                                                                                                                                                                                                                                                                                                                                                                                                                                                                                                                                                                                                                                                                                                                                                                                                                                                                                                                                                                                                                                                                                                                                                                                                                                                                                                                                                                                                                                                                                                                                                                                                                                                                                                                                                                                                                                                                                                                                                                                                                                                                                                                                                                                                                                                                                                                                                                                                                                                                                                                                                                                                                                                |
| <p>Non so se mi crederete. Passiamo metà della vita a deridere ciò in cui altri credono, e l'altra metà in ciò che altri deridono. Camminavo una notte in riva al mare di Brigantes, dove le case sembrano navi affondate, immerse nella nebbia e nei vapori marini, e il vento dà ai rami degli oleandri lente movenze di alga. Non so dire se cercassi qualcosa, o se fossi inseguito: ricordo che erano tempi difficili ma io ero, per qualche strana ragione, felice.</p> <p>Improvvisamente dal sipario del buio uscì un vecchio elegante, vestito di nero, con una gardenia all'occhiello, e passandomi vicino si inchinò leggermente. Mi misi a seguirlo incuriosito. Andavo di buon passo ma faticavo a stargli dietro, perché sembrava che procedesse volando a un palmo da terra, e i suoi piedi non facevano rumore sul legno umido del molo. Il vecchio si fermò un attimo, tracciando in aria gesti con cui sembrava calcolare la posizione delle stelle. Poi annuì con la testa e prese a discendere una scaletta che dal molo calava nelle acque scure. - Si fermi signore – gridai – non lo faccia! Ma il vecchio non mi ascoltò, in breve tempo fu nell'acqua fino alla cintola, e poco dopo scomparve.</p> <p>Senza indugiare, vestito com'ero, mi tuffai. L'acqua era gelida, e sul fondale melmoso giacevano detriti e cordami. Mi guardai intorno cercando tracce dell'uomo e con mia grande meraviglia vidi, sospesa a pochi metri dal fondo, un'insegna luminosa con la scritta "Bar". Verso di essa si dirigeva tranquillamente, camminando come un palombaro, il vecchio della gardenia. Come in un sogno nuotai anch'io verso quell'insegna che illuminava l'acqua di azzurro. Arrivai così a una costruzione intarsiata di nautili, con una porta di legno.</p> <p>La porta si aprì subito e il signore con la gardenia mi tese la mano. Non fece altro che tirarmi dentro di colpo e mi trovai in un bar accogliente, luminoso e pieno di avventori.</p> <p>Era arredato con mobili di stile diverso, alcuni di antico gusto marinaro, altri esotici, altri decisamente moderni. Il bancone sembrava la fiancata di una nave, tanto era lucido e imponente. Sopra lo schieramento delle bottiglie c'era un grande oblò di vetro da cui si potevano ammirare candelabri di corallo e branchi di pesci. Gli avventori bevevano e chiacchieravano come in un qualsiasi bar di terraferma.</p> <p>Come potete constatare dal disegno di copertina, formavano il gruppo più stravagante che io avessi mai visto. Il barista mi fece segno di avvicinarmi. Aveva un'espressione ironica e il suo volto ricordava quello di un famoso interprete di fil dell'orrore.</p> |

|                                                                                                                                                                                                                                                                                         |
|-----------------------------------------------------------------------------------------------------------------------------------------------------------------------------------------------------------------------------------------------------------------------------------------|
| Mi offrì un bicchiere di vino e mi appuntò una gardenia all'occhiello. - Siamo lieti di averla tra noi – disse sottovoce. La prego di accomodarsi, perché, questa è la notte in cui ognuno dei presenti racconterà una storia. Mi sedetti, e ascoltai i racconti del bar sotto il mare. |
| (tratto da S. Benni, <i>Il bar sotto il mare</i> , © Giangiacomo Feltrinelli Editori, Milano, 1998)                                                                                                                                                                                     |

#### Additional texts used in the COPY task

| b) Set of nonword |             |
|-------------------|-------------|
| Spato             | Badapana    |
| Chiampa           | Dopustrigli |
| Cogheste          | Chicheporu  |
| Tatripsi          | Putrignu    |
| Manumolli         | Mamelestu   |
| Tigiglione        | Sirfonuglio |
| Riumtaghire       | Scefo       |
| Strascridi        | Parda       |
| Clabiturra        | Trugnusco   |
| Pavalatto         | Senamirca   |

| c) Set of Numbers |            |
|-------------------|------------|
| 2659452526        | 4174769183 |
| 4125130491        | 2742629450 |
| 0676898080        | 4340430282 |
| 9043019376        | 6156158369 |
| 7953788976        | 4528139151 |
| 7376858532        | 7975073408 |
| 5231231728        | 4174769183 |
| 2742629450        |            |

| d) Set of short sentences                                                                                                     |
|-------------------------------------------------------------------------------------------------------------------------------|
| Davide è canadese e ha 19 anni.                                                                                               |
| Trascorre le vacanze in Francia.                                                                                              |
| Fa visita al suo amico Moris.                                                                                                 |
| Hanno visitato Parigi e hanno visto la Tour Eiffel. Questa sera vanno al parco giochi con la metro. C'è tanta gente e rumore. |
| Vedono le giostre.                                                                                                            |
| Davide intravede da lontano un borseggiatore.                                                                                 |
| Il borseggiatore fruga nella borsa di una donna vestita di rosso.                                                             |
| Davide interpella il borseggiatore.                                                                                           |
| Tutti i passanti si girano e il borseggiatore scappa.                                                                         |
| La donna vestita di rosso ringrazia Davide e Moris e offre ai ragazzi un giro sulla panoramica.                               |

**Table S1.** Main results of general linear model analysis between neuropsychological test scores and outcome variables. Gray boxes represent outcomes collected in the COPY task; white boxes are referred to outcomes collected during the READ task.

| ORIGIN                                  | DEPENDENT VARIABLE                       | TYPE III<br>SUM OF<br>SQUARES | QUADRATIC<br>MEAN | F          | P            | OBSERVE<br>D<br>POWER <sup>κ</sup> |
|-----------------------------------------|------------------------------------------|-------------------------------|-------------------|------------|--------------|------------------------------------|
| <b>TEA for<br/>visual<br/>attention</b> | Session duration                         | 6698981.492                   | 6698981.492       | 7.764      | <b>0.010</b> | 0.762                              |
|                                         | Screen fixation                          | 1741714.258                   | 1741714.258       | 2.604      | 0.120        | 0.341                              |
|                                         | Mouse activity                           | 1266054.652                   | 1266054.652       | 8.011      | <b>0.009</b> | 0.775                              |
|                                         | Keyboard activity                        | 155325.108                    | 155325.108        | 3.717      | 0.066        | 0.457                              |
|                                         | Any single peripheral active             | 5096639.545                   | 5096639.545       | 8.900      | <b>0.006</b> | 0.816                              |
|                                         | Three peripherals active                 | 609.052                       | 609.052           | 1.676      | 0.208        | 0.237                              |
|                                         | Screen fixation & (mouse or<br>keyboard) | 282097.048                    | 282097.048        | 0.855      | 0.364        | 0.144                              |
|                                         | Copying error of commission              | 178.328                       | 178.328           | 1.227      | 0.279        | 0.186                              |
|                                         | Session duration                         | 345.934                       | 345.934           | 1.687      | 0.206        | 0.239                              |
|                                         | Screen fixation                          | 1143.417                      | 1143.417          | 3.495      | 0.074        | 0.434                              |
| <b>TEA error<br/>of<br/>omission</b>    | Session duration                         | 842042.507                    | 842042.507        | 0.976      | 0.333        | 0.158                              |
|                                         | Screen fixation                          | 146594.415                    | 146594.415        | 0.219      | 0.644        | 0.073                              |
|                                         | Mouse activity                           | 178265.114                    | 178265.114        | 1.128      | 0.299        | 0.175                              |
|                                         | Keyboard activity                        | 33983.883                     | 33983.883         | 0.813      | 0.376        | 0.139                              |
|                                         | Any single peripheral active             | 510269.322                    | 510269.322        | 0.891      | 0.355        | 0.148                              |
|                                         | Three peripherals active                 | 261.883                       | 261.883           | 0.721      | 0.404        | 0.129                              |
|                                         | Screen fixation & (mouse or<br>keyboard) | 63043.616                     | 63043.616         | 0.191      | 0.666        | 0.070                              |
|                                         | Copying error of commission              | 1589.219                      | 1589.219          | 10.93<br>9 | <b>0.003</b> | 0.887                              |
|                                         | Session duration                         | 64.817                        | 64.817            | 0.316      | 0.579        | 0.084                              |
|                                         | Screen fixation                          | 5.569                         | 5.569             | 0.017      | 0.897        | 0.052                              |

Table 2 <sup>κ</sup> α =.05

**Figure S1.** Gini graph of TEA visual attention, showing the cumulative relative frequencies on the abscissa axis and the cumulative relative quantities on the ordinate axis; the area under the equidistributional line expresses the area of maximum concentration.

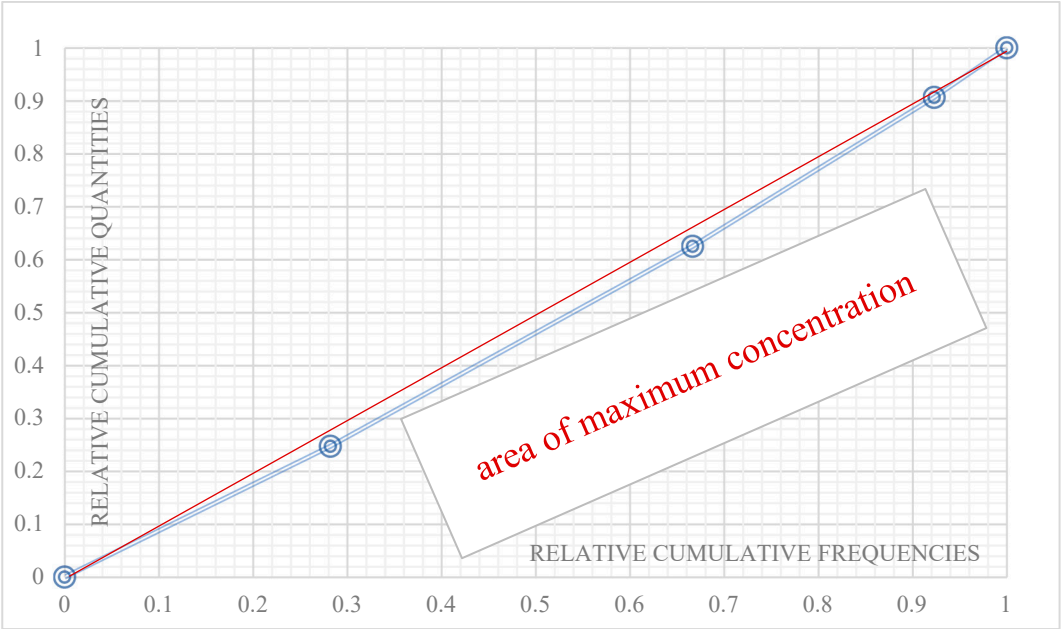

Supplement: s1 [file s1]
